# Supplementary material
Source: MDPI journal article supplement (https://www.mdpi.com/2073-4433/8/8/149)
Supplement: s1 [file s1]

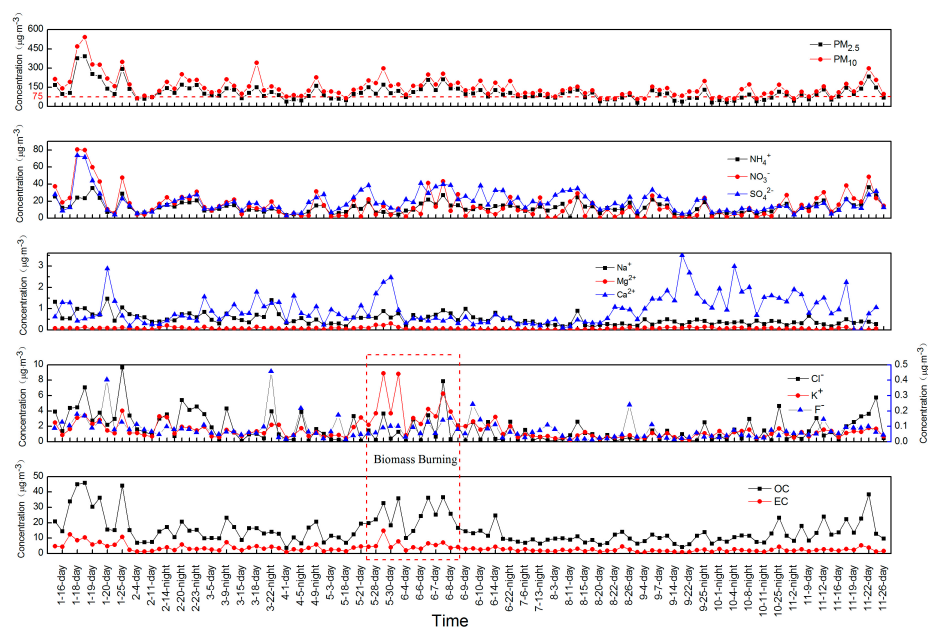

Figure S1 Temporal variations of mass concentrations of aerosols and main chemical components in PM<sub>2.5</sub>

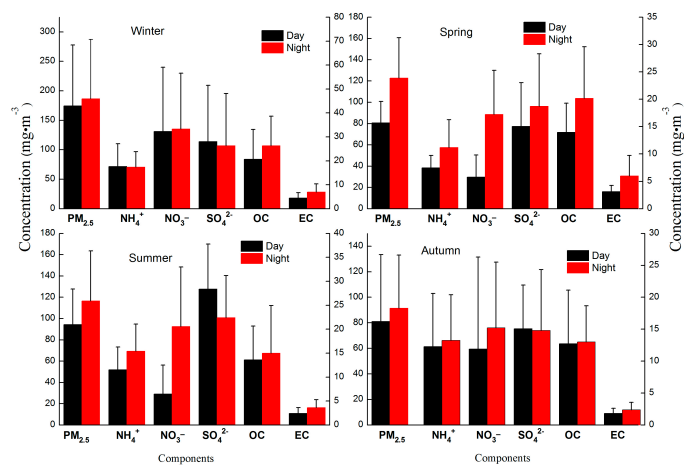

Figure S2 Day-night variations of PM<sub>2.5</sub> and main chemical components in four seasons

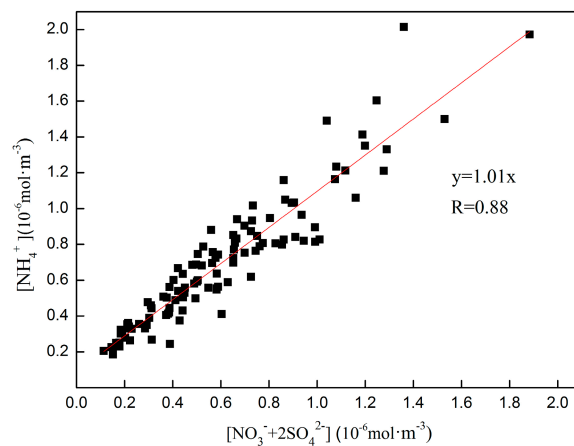

Figure S3 Correlation analysis of molar concentrations of SO<sub>4</sub><sup>2-</sup>, NO<sub>3</sub><sup>-</sup> and NH<sub>4</sub><sup>+</sup>

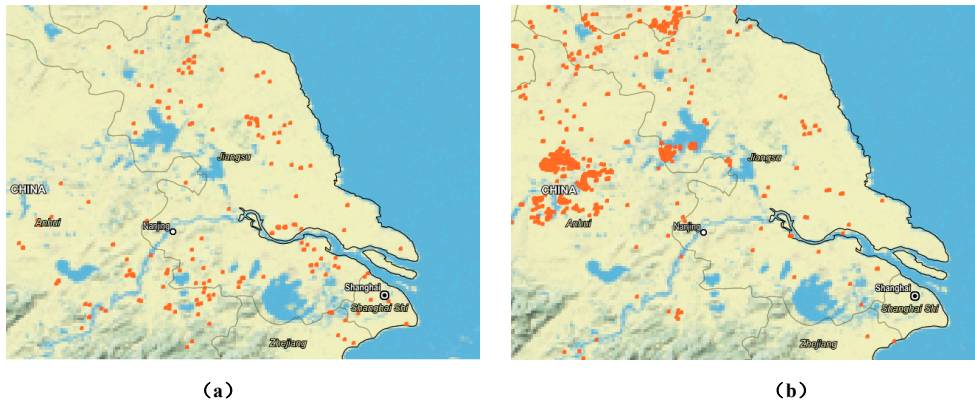

Figure S4 Satellite images of fire points during typical biomass burning episodes

(a) 5.28-5.31 (b) 6.6-6.8

(<https://firms.modaps.eosdis.nasa.gov/firemap/>)

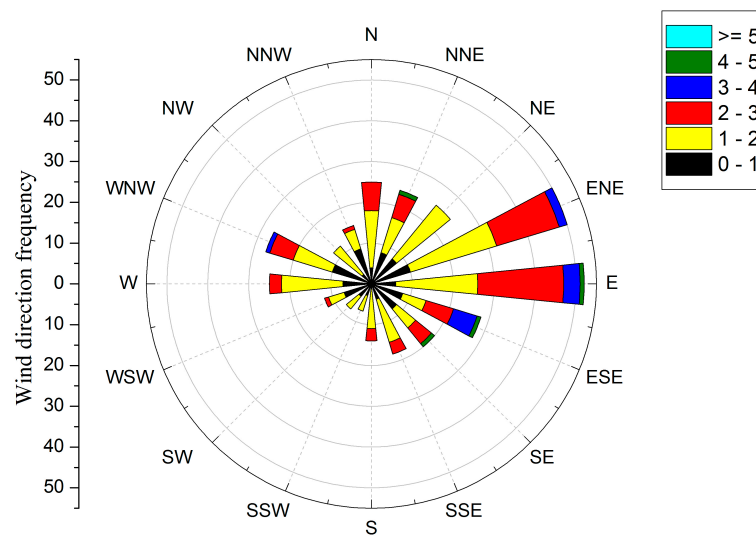

Figure S5 Wind rose map from January to November 2014 in suburban Nanjing
